# Supplementary material
Source: PubMed Central journal article supplement (PMC4975984)

# Figure 2

**a**

Random Foraging (RF)

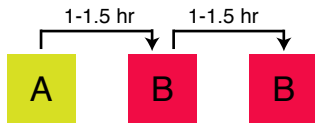

Context

**b**

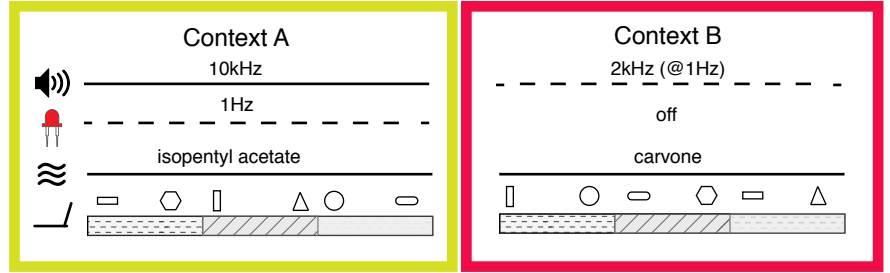

**c**

Population vector correlation

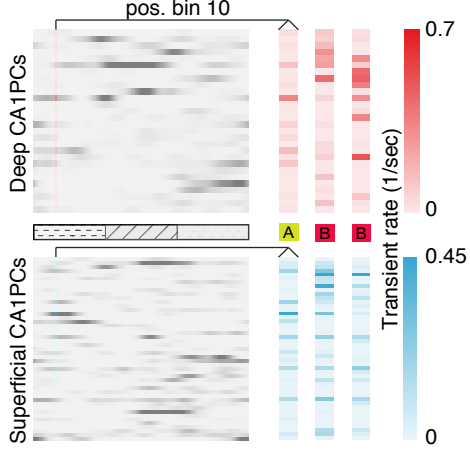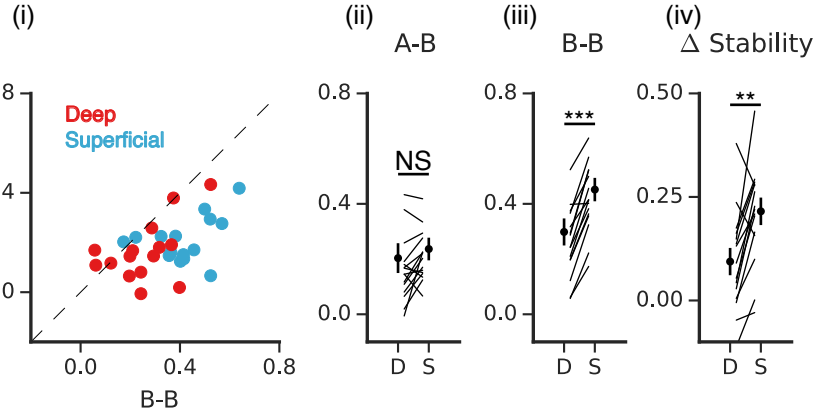

**d**

Tuning curve correlation

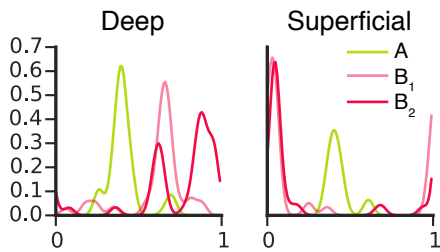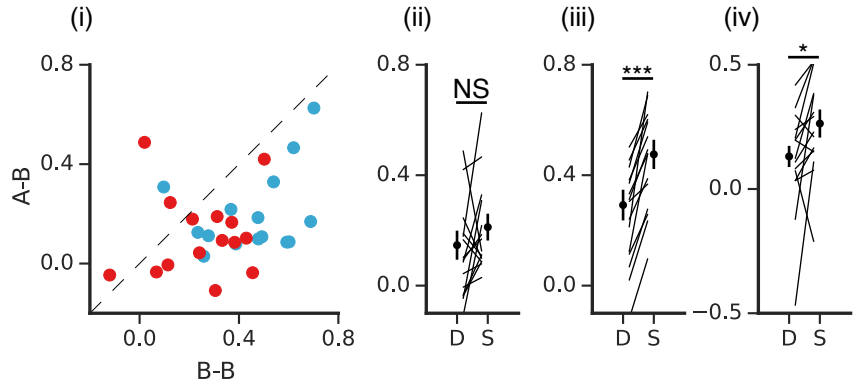

Supplement: NIHMS796116-supplement-2.pdf [file NIHMS796116-supplement-2.pdf]
