# Supplementary material
Source: PubMed Central journal article supplement (PMC4975984)

# Figure 1

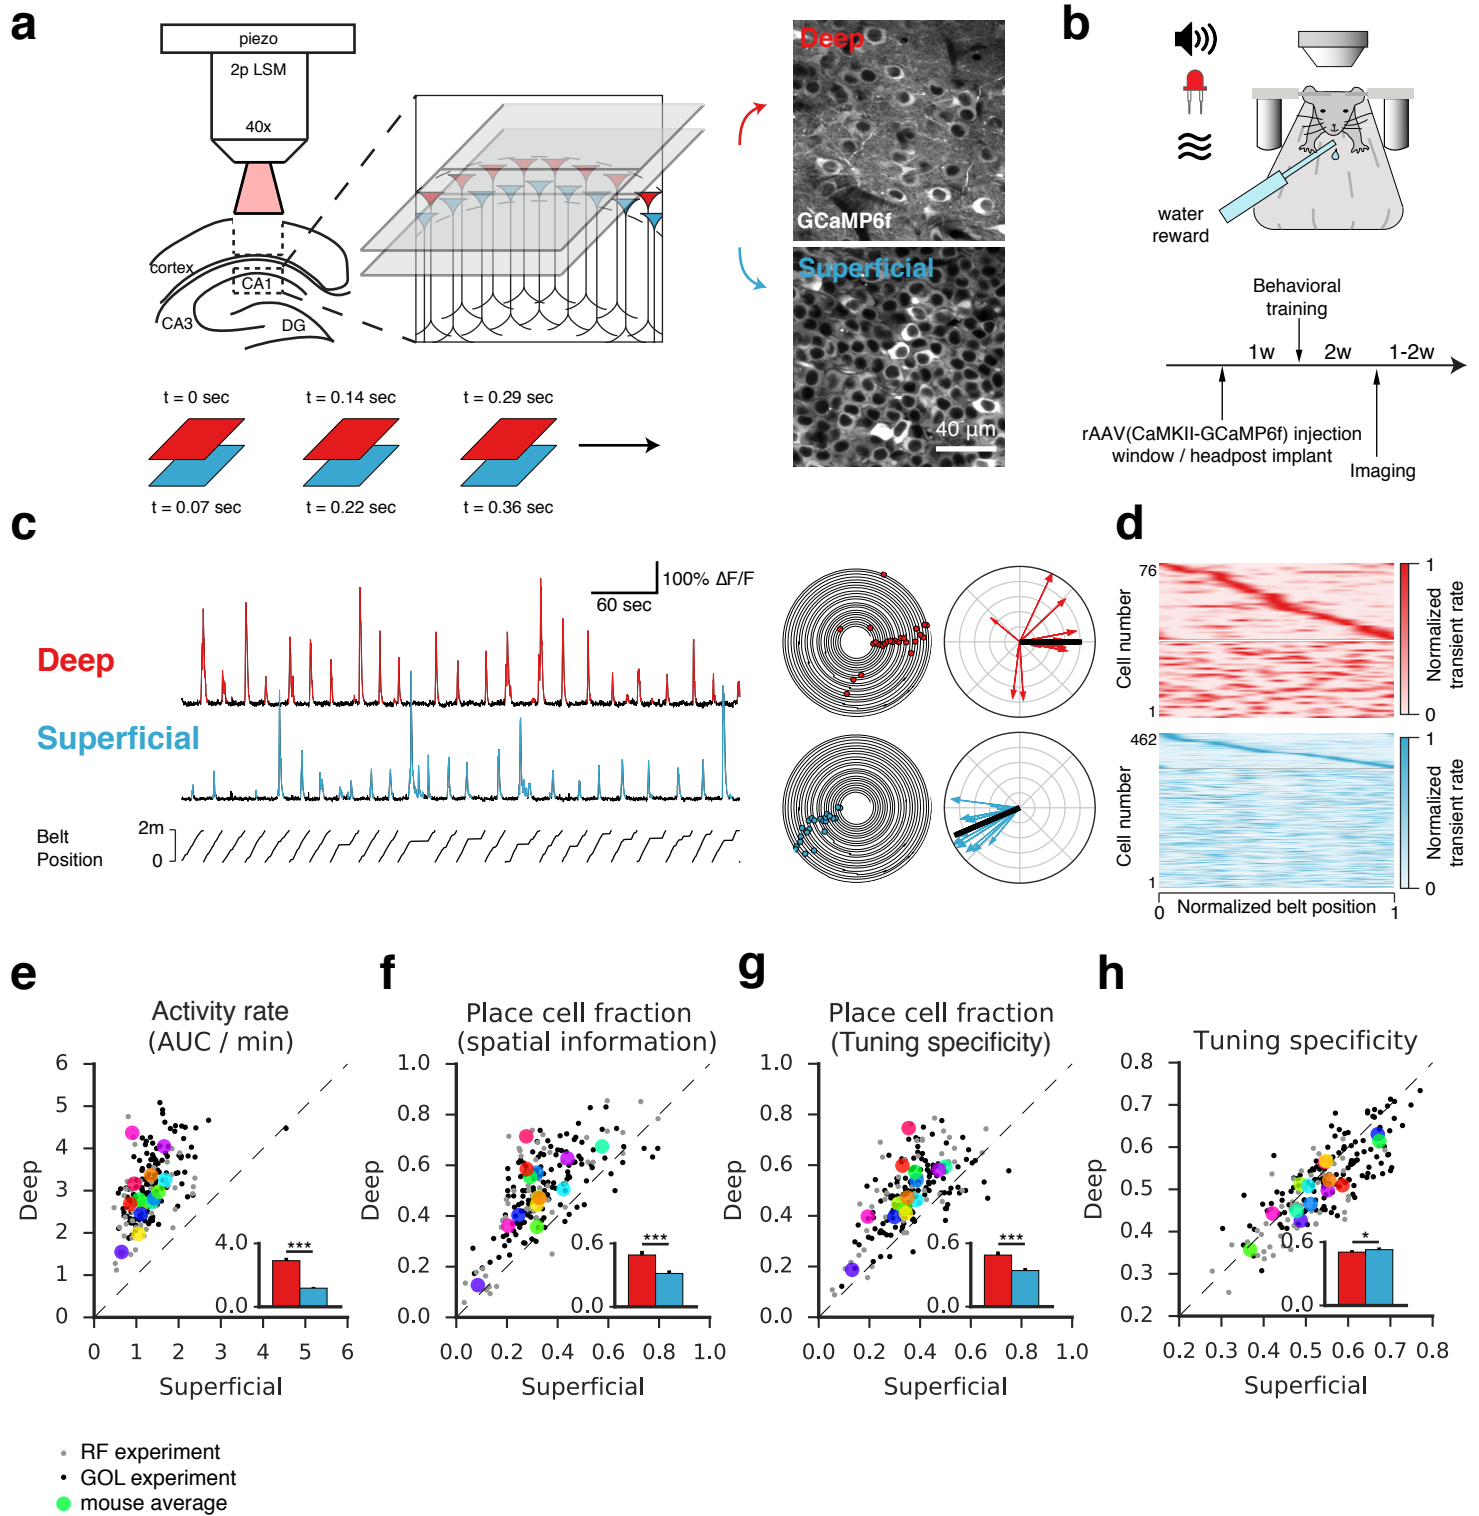

Supplement: NIHMS796116-supplement-1.pdf [file NIHMS796116-supplement-1.pdf]

# Figure 3

**a**

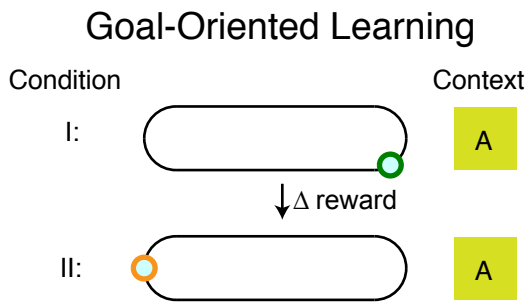

**b**

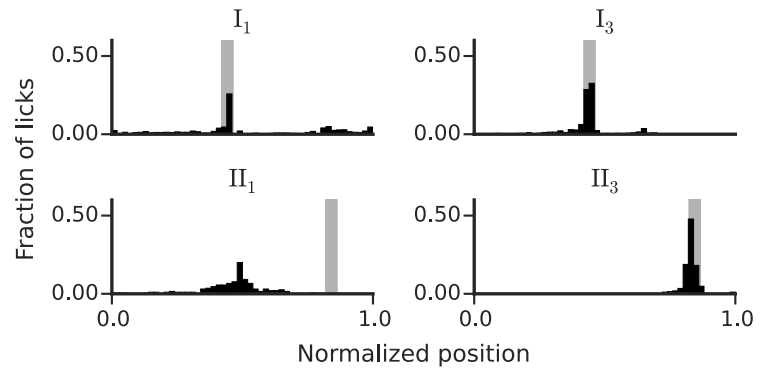

**c**

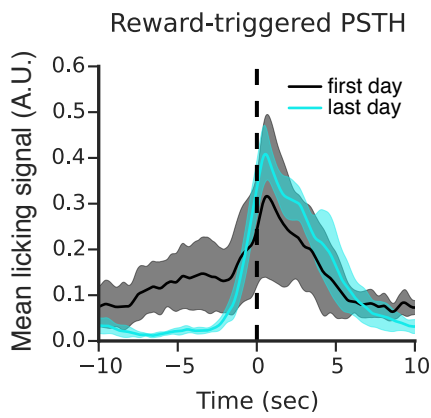

**d**

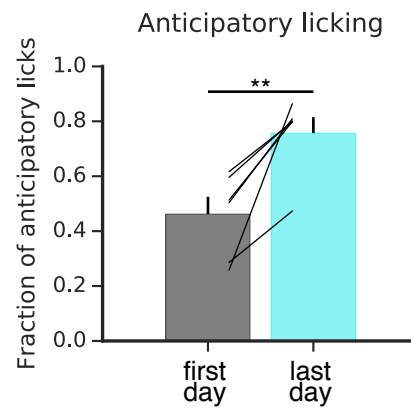

**e**

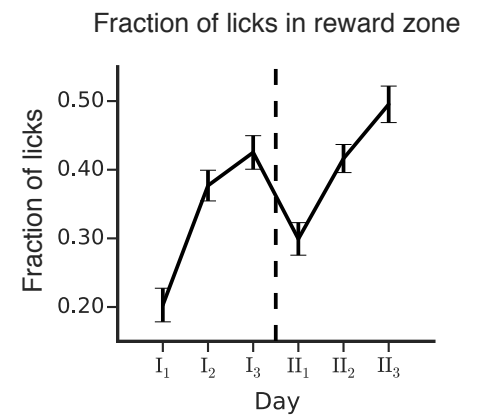

Supplement: NIHMS796116-supplement-3.pdf [file NIHMS796116-supplement-3.pdf]

# Figure 4

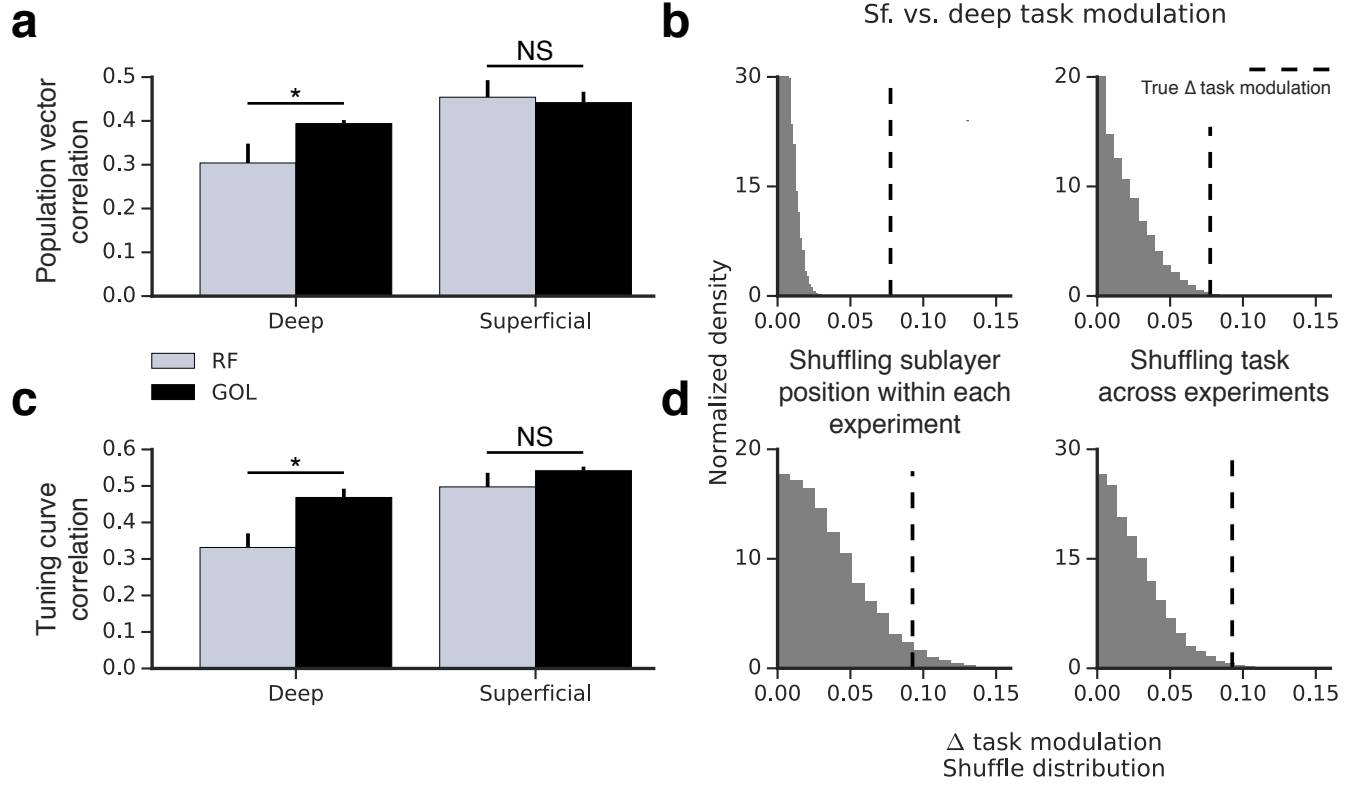

Supplement: NIHMS796116-supplement-4.pdf [file NIHMS796116-supplement-4.pdf]

# Figure 5

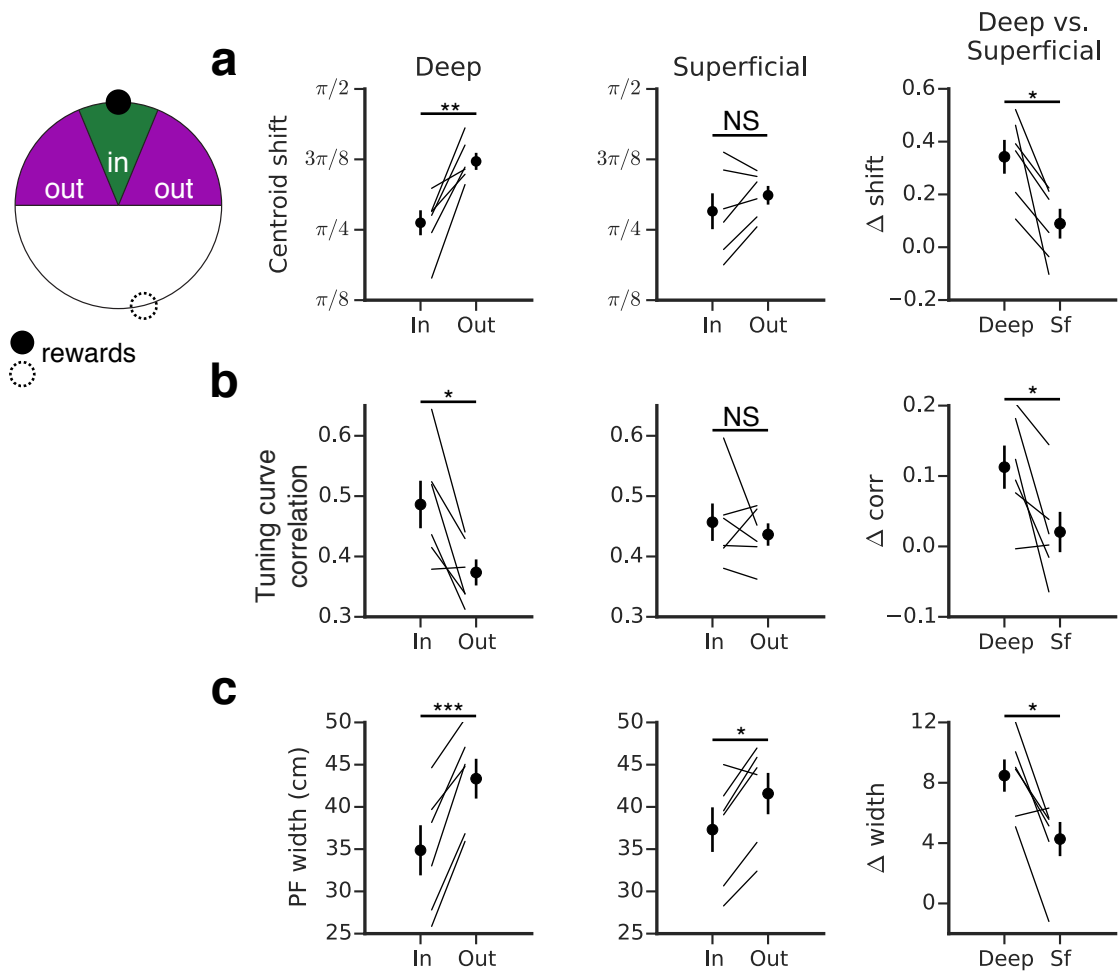

Supplement: NIHMS796116-supplement-5.pdf [file NIHMS796116-supplement-5.pdf]

# Figure 6

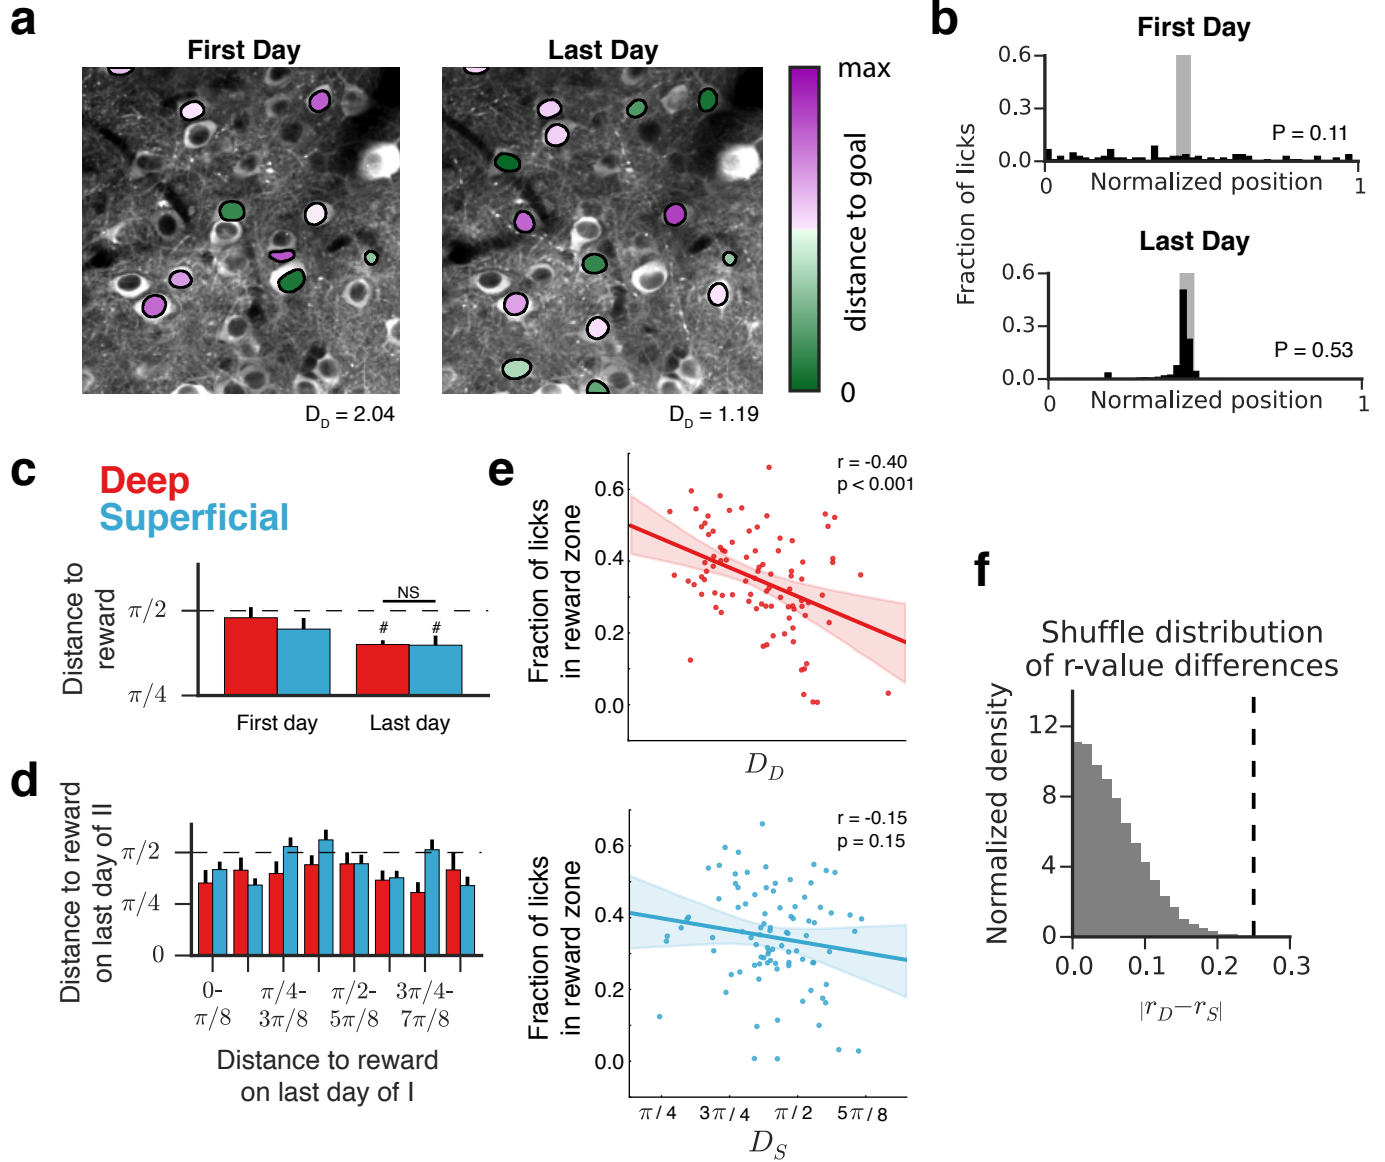

Supplement: NIHMS796116-supplement-6.pdf [file NIHMS796116-supplement-6.pdf]
